# Supplementary material
Source: HighWire-hosted journal article supplement (https://erj.ersjournals.com/content/54/3/1900435)
Supplement: inline-supplementary-material-2 [file inline-supplementary-material-2.pdf]

Table S2. The following keywords were used for search on Medline for lung ultrasound

---

**COPD**

((("Pulmonary Disease, Chronic Obstructive"[Mesh] OR "COPD")) AND ("Ultrasonography"[Mesh] OR "lung ultrasonography" OR "lung ultrasound")) AND ("Critical Care"[Mesh] OR "Intensive Care Units"[Mesh] OR "intensive care" OR "critical care")

**ARDS**

((("Respiratory Distress Syndrome, Adult"[Mesh] OR "ARDS" OR "acute respiratory distress syndrome")) AND ("Ultrasonography"[Mesh] OR "lung ultrasonography" OR "lung ultrasound")) AND ("Critical Care"[Mesh] OR "Intensive Care Units"[Mesh] OR "intensive care" OR "critical care")

**ALI**

((("Acute Lung Injury"[Mesh]) AND ("Ultrasonography"[Mesh] OR "lung ultrasonography" OR "lung ultrasound")) AND ("Critical Care"[Mesh] OR "Intensive Care Units"[Mesh] OR "intensive care" OR "critical care")

**PNEUMOTHORAX**

((("Pneumothorax"[Mesh]) AND ("Ultrasonography"[Mesh] OR "lung ultrasonography" OR "lung ultrasound")) AND ("Critical Care"[Mesh] OR "Intensive Care Units"[Mesh] OR "intensive care" OR "critical care")

**PLEURAL EFFUSION**

((("Pleural Effusion"[Mesh]) AND ("Ultrasonography"[Mesh] OR "lung ultrasonography" OR "lung ultrasound")) AND ("Critical Care"[Mesh] OR "Intensive Care Units"[Mesh] OR "intensive care" OR "critical care")

**PNEUMONIA**

((("Pneumonia"[Mesh]) AND ("Ultrasonography"[Mesh] OR "lung ultrasonography" OR "lung ultrasound")) AND ("Critical Care"[Mesh] OR "Intensive Care Units"[Mesh] OR "intensive care" OR "critical care")

**PULMONARY EDEMA**

((("Pulmonary Edema"[Mesh]) AND ("Ultrasonography"[Mesh] OR "lung ultrasonography" OR "lung ultrasound")) AND ("Critical Care"[Mesh] OR "Intensive Care Units"[Mesh] OR "intensive care" OR "critical care")
