# Supplementary material
Source: HighWire-hosted journal article supplement (https://erj.ersjournals.com/content/54/3/1900435)
Supplement: inline-supplementary-material-4 [file inline-supplementary-material-4.pdf]

Table S4. The following keywords were used for search on Medline for positron emission tomography

---

**COPD**

((("Pulmonary Disease, Chronic Obstructive"[Mesh] OR "COPD")) AND ("Positron-Emission Tomography"[Mesh] OR "PET" OR "positron emission tomography")) AND (("Critical Care"[Mesh]) OR "Intensive Care Units"[Mesh] OR "intensive care" OR "critical care")

**ARDS**

((("Respiratory Distress Syndrome, Adult"[Mesh] OR "ARDS" OR "acute respiratory distress syndrome")) AND ("Positron-Emission Tomography"[Mesh] OR "PET" OR "positron emission tomography")) AND (("Critical Care"[Mesh]) OR "Intensive Care Units"[Mesh] OR "intensive care" OR "critical care")

**ALI**

((("Acute Lung Injury"[Mesh] OR "ALI" OR "acute lung injury")) AND ("Positron-Emission Tomography"[Mesh] OR "PET" OR "positron emission tomography")) AND (("Critical Care"[Mesh]) OR "Intensive Care Units"[Mesh] OR "intensive care" OR "critical care")

**PNEUMOTHORAX**

((("Pneumothorax"[Mesh]) AND ("Positron-Emission Tomography"[Mesh] OR "PET" OR "positron emission tomography")) AND (("Critical Care"[Mesh]) OR "Intensive Care Units"[Mesh] OR "intensive care" OR "critical care")

**PLEURAL EFFUSION**

((("Pleural Effusion"[Mesh]) AND ("Positron-Emission Tomography"[Mesh] OR "PET" OR "positron emission tomography")) AND (("Critical Care"[Mesh]) OR "Intensive Care Units"[Mesh] OR "intensive care" OR "critical care")

**PNEUMONIA**

((("Pneumonia"[Mesh]) AND ("Positron-Emission Tomography"[Mesh] OR "PET" OR "positron emission tomography")) AND (("Critical Care"[Mesh]) OR "Intensive Care Units"[Mesh] OR "intensive care" OR "critical care")

**PULMONARY EDEMA**

((("Pulmonary Edema"[Mesh]) AND ("Positron-Emission Tomography"[Mesh] OR "PET" OR "positron emission tomography")) AND (("Critical Care"[Mesh]) OR "Intensive Care Units"[Mesh] OR "intensive care" OR "critical care")
